# Supplementary material
Source: ML conference proceedings conference paper supplement (https://proceedings.mlr.press/v119/scialom20a.html)
Supplement: Supplementary file [file scialom20a-supp.pdf]

---

# Discriminative Adversarial Search for Abstractive Summarization

## Supplementary Material

---

Thomas Scialom<sup>1,2</sup> Paul-Alexis Dray<sup>1</sup> Sylvain Lamprier<sup>2</sup> Benjamin Piwowarski<sup>2,3</sup> Jacopo Staiano<sup>1</sup>

### 1. Implementation details

All models are implemented in PyText (Aly et al., 2018). For all our experiments we used a single RTX 2080 Ti GPU.

To train the discriminator, we used the Adam optimiser with the recommended parameters for BERT: learning rate of  $3e^{-5}$ , batch size of 4 and accumulated batch size of 32. We trained it for 5 epochs; each epoch took 100 minutes on 150k samples. During discriminator retraining, the generator is needed and thus additional memory is required: all else equal, we decreased the batch size to 2. The self-training process takes one epoch to converge, in about 500 minutes: 200 minutes for training the discriminator and 300 minutes to generate the summaries with the search procedure described in Algorithm 1.

### References

Aly, A., Lakhota, K., Zhao, S., Mohit, M., Oguz, B., Arora, A., Gupta, S., Dewan, C., Nelson-Lindall, S., and Shah, R. Pytext: A seamless path from nlp research to production. *arXiv preprint arXiv:1812.08729*, 2018.

---

<sup>1</sup>reciTAL, Paris, France <sup>2</sup>Sorbonne Université, CNRS, LIP6, F-75005 Paris, France <sup>3</sup>CNRS, France. Correspondence to: Thomas Scialom <thomas@recital.ai>.
